# Supplementary material
Source: PubMed Central journal article supplement (PMC7387162)
Supplement: NIHMS1579916-supplement-1.pdf [file NIHMS1579916-supplement-1.pdf]

eTable 1: Multivariate-Adjusted Differences in IgG and IgG Subclass Concentrations Standardized to the Upper Limit of Normal According to Sex and Race ( $\beta$ , 95% CI)

| IgG Subclass<br>(mg/dL) | Sex                      |                 | Race                  |                       |                 |
|-------------------------|--------------------------|-----------------|-----------------------|-----------------------|-----------------|
|                         | Female                   | Male            | Asian                 | Black                 | White           |
| <b>IgG</b>              | +0.003<br>(-0.01, +0.02) | 0.0 (Reference) | +0.3<br>(+0.2, +0.3)* | +0.4<br>(+0.3, +0.4)* | 0.0 (Reference) |
| <b>IgG1</b>             | +0.004<br>(-0.01, +0.02) | 0.0 (Reference) | +0.2<br>(+0.2, +0.3)* | +0.4<br>(+0.3, +0.4)* | 0.0 (Reference) |
| <b>IgG2</b>             | -0.004<br>(-0.01, +0.01) | 0.0 (Reference) | +0.3<br>(+0.3, +0.3)* | +0.1<br>(+0.1, +0.1)* | 0.0 (Reference) |
| <b>IgG3</b>             | +0.004<br>(-0.02, +0.03) | 0.0 (Reference) | +0.2<br>(+0.1, +0.2)* | +0.2<br>(+0.2, +0.3)* | 0.0 (Reference) |
| <b>IgG4</b>             | -0.2<br>(-0.2, -0.1)*    | 0.0 (Reference) | +0.9<br>(+0.8, +1.1)* | +0.2<br>(+0.1, +0.2)* | 0.0 (Reference) |

\*  $p < 0.05$

eTable 2: Multivariate-Adjusted Differences (mg/dL) in IgG and IgG Subclass Concentrations According to Sex and Race Using Each Subject's Highest Concentration ( $\beta$ , 95% CI)

| IgG Subclass<br>(mg/dL) | Sex                      |                 | Race                        |                             |                 |
|-------------------------|--------------------------|-----------------|-----------------------------|-----------------------------|-----------------|
|                         | Female                   | Male            | Asian                       | Black                       | White           |
| <b>IgG</b>              | -47.4<br>(-70.8, -24.1)* | 0.0 (Reference) | +415.4<br>(+340.1, +490.7)* | +587.3<br>(+534.4, +640.3)* | 0.0 (Reference) |
| <b>IgG1</b>             | +1.2<br>(-11.2, +13.5)   | 0.0 (Reference) | +197.2<br>(+157.8, +236.6)* | +344.9<br>(+316.6, +373.1)* | 0.0 (Reference) |
| <b>IgG2</b>             | -4.0<br>(-10.7, +2.8)    | 0.0 (Reference) | +199.3<br>(+117.9, +220.8)* | +77.6<br>(+62.1, +93.0)*    | 0.0 (Reference) |
| <b>IgG3</b>             | -0.0<br>(-2.9, +2.8)     | 0.0 (Reference) | +23.2<br>(+14.2, +32.3)*    | +36.2<br>(+29.7, +42.7)*    | 0.0 (Reference) |
| <b>IgG4</b>             | -20.9<br>(-25.2, -16.6)* | 0.0 (Reference) | +100.8<br>(+87.0, +114.6)*  | +13.4<br>(+3.6, +23.2)*     | 0.0 (Reference) |

\*  $p < 0.05$

eTable 3: Multivariate-Adjusted Differences (mg/dL) in IgG and IgG Subclass Concentrations According to Sex and Race Using All Available IgG and IgG Subclass Concentrations for Each Subject ( $\beta$ , 95% CI)

| IgG Subclass (mg/dL) | Sex                      |                 | Race                        |                             |                 |
|----------------------|--------------------------|-----------------|-----------------------------|-----------------------------|-----------------|
|                      | Female                   | Male            | Asian                       | Black                       | White           |
| <b>IgG</b>           | +17.3<br>(-48.0, +82.7)  | 0.0 (Reference) | +565.0<br>(+354.6, +775.5)* | +624.0<br>(+437.0, +811.0)* | 0.0 (Reference) |
| <b>IgG1</b>          | -7.0<br>(-25.7, +11.7)   | 0.0 (Reference) | +216.8<br>(+150.5, +283.1)* | +361.6<br>(+292.1, +431.2)* | 0.0 (Reference) |
| <b>IgG2</b>          | -19.2<br>(-32.6, -5.8)*  | 0.0 (Reference) | +243.1<br>(+152.6, +333.5)* | +93.3<br>(+47.5, +139.1)*   | 0.0 (Reference) |
| <b>IgG3</b>          | -2.3<br>(-6.0, +1.4)     | 0.0 (Reference) | +28.6<br>(+10.8, +46.4)*    | +49.5<br>(+26.1, +73.0)*    | 0.0 (Reference) |
| <b>IgG4</b>          | -51.5<br>(-74.3, -28.8)* | 0.0 (Reference) | +148.0<br>(+44.3, +251.8)*  | +25.7<br>(-14.0, +65.4)     | 0.0 (Reference) |

\*  $p < 0.05$

eTable 4: Multivariate-Adjusted IgG Concentration Differences (mg/dL) Excluding Patients Diagnosed with Immune Deficiency According to Sex and Race ( $\beta$ , 95% CI)

| IgG Subclass (mg/dL) | Race                     |                          |                 |
|----------------------|--------------------------|--------------------------|-----------------|
|                      | Asian                    | Black                    | White           |
| <b>IgG</b>           | +367.8 (+303.2, +432.4)* | +513.9 (+469.7, +558.0)* | 0.0 (Reference) |
| <b>IgG1</b>          | +200.5 (+159.2, +241.7)* | +347.2 (+318.1, +376.3)* | 0.0 (Reference) |
| <b>IgG2</b>          | +191.4 (+169.3, +213.5)* | +75.6 (+60.0, +91.2)*    | 0.0 (Reference) |
| <b>IgG3</b>          | +20.9 (+11.2, +30.7)*    | +35.8 (+28.9, +42.7)*    | 0.0 (Reference) |
| <b>IgG4</b>          | +104.1 (+90.4, +117.9)*  | +10.8 (+1.2, +20.4)*     | 0.0 (Reference) |

\*  $p < 0.05$

eTable 5: Multivariate-Adjusted Differences in IgA, IgE, and IgM Concentrations According to Sex and Race ( $\beta$ , 95% CI)

| Ig Class           | Sex                        |                 | Race                      |                             |                 |
|--------------------|----------------------------|-----------------|---------------------------|-----------------------------|-----------------|
|                    | Female                     | Male            | Asian                     | Black                       | White           |
| <b>IgA (mg/dL)</b> | -18.3<br>(-25.3, -11.3)*   | 0.0 (Reference) | +62.1<br>(+40.3, +83.9)*  | +103.4<br>(+86.9, +119.8)*  | 0.0 (Reference) |
| <b>IgE (mg/dL)</b> | -122.0<br>(-178.4, -65.6)* | 0.0 (Reference) | +172.8<br>(-11.0, +356.6) | +488.9<br>(+338.6, +639.3)* | 0.0 (Reference) |
| <b>IgM (IU/mL)</b> | +19.3<br>(+11.6, +27.0)*   | 0.0 (Reference) | -0.0<br>(-24.2, +24.1)    | -2.5<br>(-20.8, +15.8)      | 0.0 (Reference) |

\*  $p < 0.05$

† Adjusted for age but data not presented

eTable 6: Age-, Sex-, Race-, and Socioeconomic Status-Adjusted Differences in IgG and IgG Subclass Concentrations ( $\beta$ , 95% CI)

| IgG Subclass (mg/dL) | Sex                      |                 | Race                        |                             |                 |
|----------------------|--------------------------|-----------------|-----------------------------|-----------------------------|-----------------|
|                      | Female                   | Male            | Asian                       | Black                       | White           |
| <b>IgG</b>           | +11.0<br>(-7.3, +29.3)   | 0.0 (Reference) | +360.8<br>(+300.1, +421.5)* | +520.6<br>(+477.5, +563.6)* | 0.0 (Reference) |
| <b>IgG1</b>          | +5.6<br>(-6.6, +17.7)    | 0.0 (Reference) | +193.7<br>(+154.5, +232.9)* | +344.0<br>(+315.5, +372.6)* | 0.0 (Reference) |
| <b>IgG2</b>          | -1.8<br>(-8.3, +4.8)     | 0.0 (Reference) | +189.3<br>(+168.3, +210.3)* | +82.7<br>(+67.4, +98.0)*    | 0.0 (Reference) |
| <b>IgG3</b>          | +0.5<br>(-2.3, +3.3)     | 0.0 (Reference) | +21.3<br>(+12.4, +30.3)*    | +35.2<br>(+28.6, +41.7)*    | 0.0 (Reference) |
| <b>IgG4</b>          | -18.3<br>(-22.2, -14.4)* | 0.0 (Reference) | +99.3<br>(+86.7, +111.8)*   | +12.2<br>(+3.2, +21.2)*     | 0.0 (Reference) |

\*  $p < 0.05$

† Adjusted for age and median income but data not presented
